# Supplementary material for: Calcium Supplements and Risk of Cardiovascular Disease: A Meta-Analysis of Clinical Trials
Source: PubMed Central journal article supplement (PMC7910980; doi:10.3390/nu13020368), 2021-01-26
Supplement: nutrients-13-00368-s001.pdf [file nutrients-13-00368-s001.pdf]

**Table S1. Summary of Risk of Bias Assessment for Randomized, Double-Blind, Placebo-Controlled Trials.<sup>a</sup>**

| Source                                  | Random Sequence Generation | Allocation Concealment | Blinding of Participants and Personnel | Blinding of Outcome Assessment | Incomplete Outcome Data | Selective Reporting | Other Bias | No. of Low Risk of Bias |
|-----------------------------------------|----------------------------|------------------------|----------------------------------------|--------------------------------|-------------------------|---------------------|------------|-------------------------|
| Dawson-Hughes et al, <sup>14</sup> 1990 | Unclear                    | Unclear                | Low                                    | Unclear                        | Unclear                 | Unclear             | Low        | 2                       |
| Reid et al, <sup>15</sup> 1995          | Unclear                    | Unclear                | Low                                    | Unclear                        | Low                     | Unclear             | Low        | 3                       |
| Baron et al, <sup>16</sup> 1999         | Low                        | Unclear                | Low                                    | Low                            | Low                     | Low                 | Low        | 6                       |
| Bonithon-Kopp, <sup>17</sup> 2000       | Unclear                    | Low                    | Low                                    | Unclear                        | Low                     | Unclear             | Low        | 4                       |
| Brazier et al, <sup>18</sup> 2005       | Low                        | Unclear                | Low                                    | Low                            | Low                     | Low                 | Low        | 6                       |
| Prince et al, <sup>19</sup> 2006        | Low                        | Unclear                | Low                                    | Low                            | Unclear                 | Low                 | Low        | 5                       |
| Bonnick et al, <sup>20</sup> 2007       | Unclear                    | Unclear                | Low                                    | Unclear                        | Low                     | Unclear             | Low        | 3                       |
| Lappe et al, <sup>21</sup> 2007         | Low                        | Unclear                | Unclear                                | Unclear                        | High                    | Low                 | Low        | 3                       |
| Reid et al, <sup>22</sup> 2008          | Low                        | Low                    | Low                                    | Low                            | High                    | Low                 | Low        | 6                       |
| Chailurkit et al, <sup>23</sup> 2010    | Unclear                    | Unclear                | Low                                    | Unclear                        | Low                     | Low                 | Low        | 4                       |
| Bolland et al, <sup>24</sup> 2011       | Low                        | Unclear                | Low                                    | Low                            | Unclear                 | Low                 | Low        | 5                       |

---

|                                   |     |         |     |     |         |     |     |   |
|-----------------------------------|-----|---------|-----|-----|---------|-----|-----|---|
| Avenell et al, <sup>25</sup> 2012 | Low | Low     | Low | Low | Unclear | Low | Low | 6 |
| Bolland et al, <sup>26</sup> 2013 | Low | Unclear | Low | Low | Low     | Low | Low | 6 |

---

<sup>a</sup>Based on the Cochrane Risk of Bias Tool.

**Table S2. Use of Calcium Supplements and Risk of Cardiovascular Disease (CVD) in the Subgroup Meta-analysis of Randomized, Double-Blind, Placebo Controlled Trials.**

| <b>Factors</b>                                                                                                                         | <b>No. of Trials</b>              | <b>Summary RR (95% CI)</b> | <b>Heterogeneity, I<sup>2</sup> (%)</b> |
|----------------------------------------------------------------------------------------------------------------------------------------|-----------------------------------|----------------------------|-----------------------------------------|
| All                                                                                                                                    | 14 <sup>14-26</sup>               | 1.15 (1.06-1.25)           | 0.0                                     |
| CVD outcome                                                                                                                            |                                   |                            |                                         |
| Incidence                                                                                                                              | 12 <sup>14-24,26</sup>            | 1.17 (1.06-1.29)           | 0.0                                     |
| Mortality                                                                                                                              | 2 <sup>25</sup>                   | 1.10 (0.94-1.28)           | 0.0                                     |
| Population                                                                                                                             |                                   |                            |                                         |
| Healthy postmenopausal women                                                                                                           | 7 <sup>14,15,19,21,23,24</sup>    | 1.17 (1.06-1.30)           | 0.0                                     |
| Subjects with underlying disease (vitamin D deficiency, low bone mineral density, previous low-trauma fracture, or colorectal adenoma) | 6 <sup>16-18,20,25</sup>          | 1.10 (0.95-1.26)           | 0.0                                     |
| Subjects with underlying disease excluding colorectal adenoma                                                                          | 4 <sup>18,20,25</sup>             | 1.10 (0.94-1.28)           | 0.0                                     |
| Subjects with colorectal adenoma                                                                                                       | 2 <sup>16,17</sup>                | 1.11 (0.79-1.54)           | 0.0                                     |
| Gender                                                                                                                                 |                                   |                            |                                         |
| Men                                                                                                                                    | 1 <sup>22</sup>                   | 3.96 (0.50-31.28)          | NA                                      |
| Women                                                                                                                                  | 9 <sup>14,15,18-21,23,24,26</sup> | 1.17 (1.06-1.30)           | 0.0                                     |
| Both                                                                                                                                   | 4 <sup>16,17,25</sup>             | 1.10 (0.95-1.27)           | 0.0                                     |

| <b>Factors</b>                                                                                          | <b>No. of Trials</b>        | <b>Summary RR (95% CI)</b> | <b>Heterogeneity, I<sup>2</sup> (%)</b> |
|---------------------------------------------------------------------------------------------------------|-----------------------------|----------------------------|-----------------------------------------|
| Mean age                                                                                                |                             |                            |                                         |
| <65 years                                                                                               | 6 <sup>14-17,22,24</sup>    | 1.16 (1.04-1.29)           | 0.0                                     |
| ≥65 years                                                                                               | 8 <sup>18-21,23-26</sup>    | 1.13 (0.99-1.29)           | 0.0                                     |
| Region                                                                                                  |                             |                            |                                         |
| Oceania (New Zealand Australia)                                                                         | 4 <sup>15,19,22,26</sup>    | 1.28 (0.99-1.65)           | 0.0                                     |
| North America (United States)                                                                           | 5 <sup>14,16,20,21,24</sup> | 1.15 (1.03-1.28)           | 0.0                                     |
| Europe (Belgium, Denmark, France, Germany, Ireland, Israel, Italy, Portugal, Spain, and United Kingdom) | 4 <sup>17,18,25</sup>       | 1.10 (0.94-1.29)           | 0.0                                     |
| Asia (Thailand)                                                                                         | 1 <sup>23</sup>             | 4.88 (0.24-100.93)         | NA                                      |
| Type of calcium preparation                                                                             |                             |                            |                                         |
| Carbonate                                                                                               | 6 <sup>16,18,19,23,25</sup> | 1.10 (0.97-1.26)           | 0.0                                     |
| Citrate                                                                                                 | 2 <sup>14,26</sup>          | 0.92 (0.17-4.93)           | 39.7                                    |
| Mixed                                                                                                   | 3 <sup>15,17,21</sup>       | 1.00 (0.39-2.56)           | 0.0                                     |
| Not specified                                                                                           | 3 <sup>20,22,24</sup>       | 1.17 (1.04-1.30)           | 0.0                                     |
| Duration of calcium supplementation                                                                     |                             |                            |                                         |
| <5 years                                                                                                | 11 <sup>14-23,25</sup>      | 1.10 (0.96-1.26)           | 0.0                                     |
| ≥5 years                                                                                                | 3 <sup>19,24,26</sup>       | 1.18 (1.06-1.31)           | 0.0                                     |

| <b>Factors</b>                           | <b>No. of Trials</b>               | <b>Summary RR (95% CI)</b> | <b>Heterogeneity, I<sup>2</sup> (%)</b> |
|------------------------------------------|------------------------------------|----------------------------|-----------------------------------------|
| Dosage of calcium supplements            |                                    |                            |                                         |
| ≤1000 mg/d                               | 10 <sup>14,15,18,20,22,23-26</sup> | 1.16 (1.06-1.26)           | 0.0                                     |
| 500-600 mg/d                             | 3 <sup>14,22,23</sup>              | 1.85 (0.27-12.52)          | 33.5                                    |
| 1000 mg/d                                | 7 <sup>15,18,20,24-26</sup>        | 1.16 (1.06-1.26)           |                                         |
| >1000 mg/d                               | 5 <sup>16,17,19,21,22</sup>        | 1.11 (0.87-1.40)           | 0.0                                     |
| Concurrent use of vitamin D              |                                    |                            |                                         |
| Calcium alone                            | 12 <sup>14-17,19-23,25,26</sup>    | 1.13 (1.00-1.28)           | 0.0                                     |
| Calcium + Vitamin D                      | 3 <sup>18,24,25</sup>              | 1.15 (1.04-1.27)           | 0.0                                     |
| Number of study participants             |                                    |                            |                                         |
| ≤1000                                    | 9 <sup>14-18,20-23</sup>           | 1.11 (0.82-1.49)           | 0.0                                     |
| >1000                                    | 5 <sup>19,24-26</sup>              | 1.15 (1.06-1.26)           | 0.0                                     |
| Mean dietary calcium Intake              |                                    |                            |                                         |
| ≤700 mg/d                                | 2 <sup>14,23</sup>                 | 0.96 (0.04-25.39)          | 55.5                                    |
| 700-1000 mg/d                            | 10 <sup>15-19,22,24-26</sup>       | 1.15 (1.06-1.25)           | 0.0                                     |
| >1000 mg/d                               | 2 <sup>20,21</sup>                 | 0.70 (0.26-1.88)           | 0.0                                     |
| No. of low risk of bias (out of 7 items) |                                    |                            |                                         |
| <5 items                                 | 6 <sup>14,15,17,20,21,23</sup>     | 0.92 (0.41-2.08)           | 0.0                                     |

| <b>Factors</b>                       | <b>No. of Trials</b>              | <b>Summary RR (95% CI)</b> | <b>Heterogeneity, I<sup>2</sup> (%)</b> |
|--------------------------------------|-----------------------------------|----------------------------|-----------------------------------------|
| ≥5 items                             | 8 <sup>16,18,19,22,24-26</sup>    | 1.15 (1.06-1.25)           | 0.0                                     |
| Data source                          |                                   |                            |                                         |
| Published data                       | 9 <sup>16,18,19,22,23,25,26</sup> | 1.15 (1.06-1.25)           | 0.0                                     |
| Unpublished data provided by authors | 5 <sup>14,15,17,20,21</sup>       | 0.81 (0.35-1.89)           | 0.0                                     |

NA, not applicable; RR, relative risk; CI, confidence interval; CVD, cardiovascular disease; BMI, body mass index.

Avenell et al's trial (Ref.43) used both calcium alone and calcium plus vitamin D in the supplementation groups. Thus, the Avenell et al's trial was separated into two trials (calcium alone vs. placebo and calcium plus vitamin D vs. vitamin D), and the number of trials for Ref.43 is 2.

**Table S3. Use of Calcium Supplements and Risk of Coronary Heart Disease (CHD) in the Subgroup Meta-analysis of Randomized, Double-Blind, Placebo Controlled Trials.**

| Factors                                                                                                      | No. of Trials                        | Summary RR (95% CI) | Heterogeneity, I <sup>2</sup> (%) |
|--------------------------------------------------------------------------------------------------------------|--------------------------------------|---------------------|-----------------------------------|
| All                                                                                                          | 9 <sup>16,18,19,21,22,24-26</sup>    | 1.16 (1.05-1.28)    | 0.0                               |
| Incidence                                                                                                    | 8 <sup>16,18,19,21,22,24,26</sup>    | 1.16 (1.03-1.31)    | 0.0                               |
| Mortality                                                                                                    | 2 <sup>25</sup>                      | 1.15 (0.94-1.41)    | 0.0                               |
| Type of CHD                                                                                                  |                                      |                     |                                   |
| Myocardial infarction                                                                                        | 8 <sup>16,18,19,21,22,24,25,26</sup> | 1.25 (1.07-1.45)    | 0.0                               |
| Angina                                                                                                       | 1 <sup>22</sup>                      | 1.49 (0.06-36.35)   | NA                                |
| Coronary revascularization                                                                                   | 2 <sup>22,24</sup>                   | 1.15 (0.99-1.34)    | 0.0                               |
| Population                                                                                                   |                                      |                     |                                   |
| Healthy postmenopausal women                                                                                 | 4 <sup>19,21,24,26</sup>             | 1.16 (1.03-1.32)    | 0.0                               |
| Subjects with underlying disease (vitamin D deficiency, previous low-trauma fracture, or colorectal adenoma) | 4 <sup>16,18,25</sup>                | 1.14 (0.95-1.37)    | 0.0                               |
| Subjects with underlying disease excluding colorectal adenoma                                                | 3 <sup>18,25</sup>                   | 1.16 (0.94-1.42)    | 0.0                               |
| Subjects with colorectal adenoma                                                                             | 1 <sup>16</sup>                      | 1.09 (0.75-1.60)    | 0.0                               |
| Gender                                                                                                       |                                      |                     |                                   |
| Men                                                                                                          | 1 <sup>22</sup>                      | 7.47 (0.43-129.50)  | NA                                |

| <b>Factors</b>                      | <b>No. of Trials</b>        | <b>Summary RR (95% CI)</b> | <b>Heterogeneity, I<sup>2</sup> (%)</b> |
|-------------------------------------|-----------------------------|----------------------------|-----------------------------------------|
| Women                               | 5 <sup>18,19,21,24,26</sup> | 1.16 (1.03-1.32)           | 0.0                                     |
| Both                                | 2 <sup>16,25</sup>          | 1.14 (0.95-1.36)           | 0.0                                     |
| Mean age                            |                             |                            |                                         |
| <65 years                           | 3 <sup>16,22,24</sup>       | 1.15 (1.01-1.31)           | 0.0                                     |
| ≥65 years                           | 6 <sup>18,19,21,25,26</sup> | 1.17 (0.99-1.38)           | 0.0                                     |
| Region                              |                             |                            |                                         |
| Oceania (Australia and New Zealand) | 3 <sup>19,22,26</sup>       | 1.23 (0.91-1.66)           | 0.0                                     |
| North America (United States)       | 3 <sup>16,21,24</sup>       | 1.15 (1.01-1.30)           | 0.0                                     |
| Europe (France and United Kingdom)  | 2 <sup>18,25</sup>          | 1.16 (0.94-1.42)           | 0.0                                     |
| Type of calcium preparation         |                             |                            |                                         |
| Carbonate                           | 5 <sup>16,18,19,25</sup>    | 1.13 (0.96-1.33)           | 0.0                                     |
| Citrate                             | 1 <sup>26</sup>             | 1.49 (0.86-2.57)           | NA                                      |
| Mixed                               | 1 <sup>21</sup>             | 0.65 (0.09-4.56)           | NA                                      |
| Not specified                       | 2 <sup>22,24</sup>          | 1.77 (0.39-7.18)           | 39.2                                    |
| Duration of calcium supplementation |                             |                            |                                         |
| <5 years                            | 6 <sup>16,18,21,22,25</sup> | 1.15 (0.96-1.37)           | 0.0                                     |
| ≥5 years                            | 3 <sup>19,24,26</sup>       | 1.16 (1.03-1.32)           | 0.0                                     |



| <b>Factors</b>                           | <b>No. of Trials</b>           | <b>Summary RR (95% CI)</b> | <b>Heterogeneity, I<sup>2</sup> (%)</b> |
|------------------------------------------|--------------------------------|----------------------------|-----------------------------------------|
| Dosage of calcium supplements            |                                |                            |                                         |
| ≤1000mg/d                                | 6 <sup>18,22,24-26</sup>       | 1.17 (1.05-1.31)           | 0.0                                     |
| 500-600 mg/d                             | 1 <sup>22</sup>                | 4.95 (0.24-101.99)         | n.a.                                    |
| 1000 mg/d                                | 5 <sup>18,24-26</sup>          | 1.17 (1.05-1.31)           | 0.0                                     |
| >1000mg/d                                | 4 <sup>16,19,21,22</sup>       | 1.10 (0.85-1.42)           | 0.0                                     |
| Concurrent use of vitamin D              |                                |                            |                                         |
| Calcium alone                            | 6 <sup>16,19,21,22,25,26</sup> | 1.13 (0.95-1.36)           | 0.0                                     |
| Calcium + Vitamin D                      | 3 <sup>18,24,25</sup>          | 1.14 (1.01-1.29)           | 0.0                                     |
| Number of study participants             |                                |                            |                                         |
| ≤1000                                    | 4 <sup>16,18,20,22</sup>       | 1.15 (0.74-1.80)           | 2.3                                     |
| >1000                                    | 5 <sup>19,24-26</sup>          | 1.16 (1.04-1.29)           | 0.0                                     |
| Mean dietary calcium Intake              |                                |                            |                                         |
| 700-1000 mg/d                            | 8 <sup>16,18,19,22,24-26</sup> | 1.16 (1.05-1.29)           | 0.0                                     |
| >1000 mg/d                               | 1 <sup>21</sup>                | 0.65 (0.91-4.56)           | 0.0                                     |
| No. of low risk of bias (out of 7 items) |                                |                            |                                         |
| <5 items                                 | 1 <sup>21</sup>                | 0.65 (0.09-4.56)           | 0.0                                     |
| ≥5 items                                 | 8 <sup>16,18,19,22,24-26</sup> | 1.16 (1.05-1.29)           | 0.0                                     |
| Data source                              |                                |                            |                                         |

| <b>Factors</b>                       | <b>No. of Trials</b>           | <b>Summary RR (95% CI)</b> | <b>Heterogeneity, I<sup>2</sup> (%)</b> |
|--------------------------------------|--------------------------------|----------------------------|-----------------------------------------|
| Published data                       | 8 <sup>16,18,19,22,24-26</sup> | 1.16 (1.05-1.29)           | 0.0                                     |
| Unpublished data provided by authors | 1 <sup>21</sup>                | 0.65 (0.09-4.56)           | 0.0                                     |

NA, not applicable; RR; relative risk; CI, confidence interval; CHD, coronary heart diseases.

Avenell et al's trial (Ref.43) used both calcium alone and calcium plus vitamin D in the supplementation groups. Thus, the Avenell et al's trial was separated into two trials (calcium alone vs. placebo and calcium plus vitamin D vs. vitamin D), and the number of trials for Ref.43 is 2.

**Table S4. Use of Calcium Supplements and Risk of Cerebrovascular Disease in the Subgroup Meta-analysis of Randomized, Double-Blind, Placebo Controlled Trials (n = 13).**

| Factors                                                                                                                                | No. of Trials                      | Summary RR (95% CI) | Heterogeneity, I <sup>2</sup> (%) |
|----------------------------------------------------------------------------------------------------------------------------------------|------------------------------------|---------------------|-----------------------------------|
| All                                                                                                                                    | 12 <sup>14-18,20-22,24-26</sup>    | 1.13 (0.97-1.31)    | 0.0                               |
| Incidence                                                                                                                              | 10 <sup>14-18,20,21,22,24,26</sup> | 1.18 (0.99-1.42)    | 0.0                               |
| Mortality                                                                                                                              | 2 <sup>25</sup>                    | 1.02 (0.79-1.32)    | 0.0                               |
| Population                                                                                                                             |                                    |                     |                                   |
| Healthy postmenopausal women                                                                                                           | 5 <sup>14,15,21,24,26</sup>        | 1.19 (0.99-1.44)    | 0.0                               |
| Subjects with underlying disease (vitamin D deficiency, low bone mineral density, previous low-trauma fracture, or colorectal adenoma) | 6 <sup>16-18,20,25</sup>           | 1.03 (0.81-1.31)    | 0.0                               |
| Subjects with underlying disease excluding colorectal adenoma                                                                          | 4 <sup>18,20,25</sup>              | 1.01 (0.78-1.31)    | 0.0                               |
| Subjects with colorectal adenoma                                                                                                       | 2 <sup>16,17</sup>                 | 1.17 (0.53-2.55)    | 0.0                               |
| Gender                                                                                                                                 |                                    |                     |                                   |
| Men                                                                                                                                    | 1 <sup>22</sup>                    | 0.50 (0.03-7.84)    | NA                                |
| Women                                                                                                                                  | 7 <sup>14,15,18,20,21,24,26</sup>  | 1.19 (0.98-1.43)    | 0.0                               |
| Both                                                                                                                                   | 4 <sup>16,17,25</sup>              | 1.04 (0.81-1.32)    | 0.0                               |
| Mean age                                                                                                                               |                                    |                     |                                   |
| <65 years                                                                                                                              | 6 <sup>14-17,22,24</sup>           | 1.17 (0.96-1.43)    | 0.0                               |
| ≥65 years                                                                                                                              | 6 <sup>18,20,21,25,26</sup>        | 1.07 (0.85-1.34)    | 0.0                               |

| <b>Factors</b>                                                                                          | <b>No. of Trials</b>              | <b>Summary RR (95% CI)</b> | <b>Heterogeneity, I<sup>2</sup> (%)</b> |
|---------------------------------------------------------------------------------------------------------|-----------------------------------|----------------------------|-----------------------------------------|
| <b>Region</b>                                                                                           |                                   |                            |                                         |
| Oceania (New Zealand)                                                                                   | 3 <sup>15,22,26</sup>             | 1.35 (0.83-2.20)           | 0.0                                     |
| North America (United States)                                                                           | 5 <sup>14,16,20,21,24</sup>       | 1.16 (0.95-1.41)           | 0.0                                     |
| Europe (Belgium, Denmark, France, Germany, Ireland, Israel, Italy, Portugal, Spain, and United Kingdom) | 4 <sup>17,18,25</sup>             | 1.03 (0.80-1.33)           | 0.0                                     |
| <b>Type of calcium preparation</b>                                                                      |                                   |                            |                                         |
| Carbonate                                                                                               | 4 <sup>16,18,25</sup>             | 1.03 (0.80-1.32)           | 0.0                                     |
| Citrate                                                                                                 | 2 <sup>14,26</sup>                | 0.91 (0.18-4.61)           | 36.8                                    |
| Mixed                                                                                                   | 3 <sup>15,17,21</sup>             | 1.15 (0.39-3.37)           | 0.0                                     |
| Not specified                                                                                           | 3 <sup>20,22,24</sup>             | 1.77 (0.95-1.43)           | 0.0                                     |
| <b>Duration of calcium supplementation</b>                                                              |                                   |                            |                                         |
| <5 years                                                                                                | 10 <sup>14-18,20,21,22,25</sup>   | 1.01 (0.80-1.28)           | 0.0                                     |
| ≥5 years                                                                                                | 2 <sup>24,25</sup>                | 1.21 (1.00-1.46)           | 0.0                                     |
| <b>Dosage of calcium supplements<sup>a</sup></b>                                                        |                                   |                            |                                         |
| ≤1000mg/d                                                                                               | 9 <sup>14,15,18,20,22,25,26</sup> | 1.17 (0.99-1.39)           | 0.0                                     |
| 500-600 mg/d                                                                                            | 2 <sup>14,22</sup>                | 0.17 (0.02-1.62)           | 0.0                                     |
| 1000 mg/d                                                                                               | 7 <sup>15,18,20,24-26</sup>       | 1.14 (0.98-1.33)           | 0.0                                     |
| >1000mg/d                                                                                               | 4 <sup>16,17,21,22</sup>          | 1.05 (0.55-2.03)           | 0.0                                     |

| <b>Factors</b>                           | <b>No. of Trials</b>               | <b>Summary RR (95% CI)</b> | <b>Heterogeneity, I<sup>2</sup> (%)</b> |
|------------------------------------------|------------------------------------|----------------------------|-----------------------------------------|
| Concurrent use of vitamin D <sup>b</sup> |                                    |                            |                                         |
| Calcium alone                            | 10 <sup>14-17,20,21,22,25,26</sup> | 1.07 (0.86-1.33)           | 0.0                                     |
| Calcium + vitamin D                      | 3 <sup>18,24,25</sup>              | 1.17 (0.98-1.40)           | 0.0                                     |
| Number of study participants             |                                    |                            |                                         |
| ≤1000                                    | 8 <sup>14-18,20-22</sup>           | 0.96 (0.53-1.72)           | 0.0                                     |
| >1000                                    | 4 <sup>24-26</sup>                 | 1.14 (0.98-1.33)           | 0.0                                     |
| Mean dietary calcium Intake              |                                    |                            |                                         |
| ≤700 mg/d                                | 1 <sup>14</sup>                    | 0.17 (0.01-4.21)           | n.a.                                    |
| 700-1000 mg/d                            | 9 <sup>15,16-18,22,24-26</sup>     | 1.14 (0.98-1.32)           | 0.0                                     |
| >1000 mg/d                               | 2 <sup>20,21</sup>                 | 0.72 (0.23-2.28)           | 0.0                                     |
| No. of low risk of bias (out of 7 items) |                                    |                            |                                         |
| <5 items                                 | 5 <sup>14,15,17,19,21</sup>        | 0.86 (0.34-2.19)           | 0.0                                     |
| ≥5 items                                 | 7 <sup>16,18,22,24-26</sup>        | 1.13 (0.98-1.32)           | 0.0                                     |
| Data source                              |                                    |                            |                                         |
| Published data                           | 7 <sup>14,18,22,24-26</sup>        | 1.13 (0.98-1.32)           | 0.0                                     |
| Unpublished data provided by authors     | 5 <sup>14,15,17,20,21</sup>        | 0.86 (0.34-2.19)           | 0.0                                     |

NA, not applicable; RR, relative risk; CI, confidence interval; TIA, transient ischemic attack.

2012 Avenell et al's trial (Ref.43) used both calcium alone and calcium plus vitamin D in the supplementation groups. Thus, the Avenell et al's trial was separated into two trials (calcium alone vs. placebo and calcium plus vitamin D vs. vitamin D), and the number of trials for Ref.43 is 2.
